# Supplementary material for: A low-cost device for measuring local magnetic anomalies in volcanic terrain
Source: Copernicus journal article supplement (doi:10.5194/gi-2018-44), 2018-11-15
Supplement: Supplementary file 1 [file Mt-Etna_data.xlsx]

## Sheet: Raw data 18-04-05 09-14-48
	GPS data				flux gate data			tilt sensor data				time
location	lat (degrees N)	long (degrees E)	elev (m asl)	height	x (V)	y (V)	z (V)	x (V)	y (V)	z (V)	Vcc (V)	absolute (s)	since start (min)
ref	37.7968	15.0636	1533.2									3.60576e+09
1	37.7956	15.0621	1546.6	4	1.8464	-1.71056	3.65377	1.52289	1.48463	1.47342	3.29124	3.60576e+09	0
1	37.7956	15.0621	1546.6	3	1.85634	-1.75617	3.72976	1.52465	1.48371	1.47339	3.29096	3.60576e+09	0.172828
1	37.7956	15.0621	1546.6	1	1.90769	-1.80963	3.88221	1.5237	1.48513	1.47469	3.29175	3.60576e+09	0.399233
2	37.7956	15.0621	1547.7	4	1.85471	-1.73535	3.68706	1.52647	1.48264	1.47662	3.29572	3.60576e+09	8.19581
2	37.7956	15.0621	1547.7	3	1.8753	-1.67738	3.7857	1.52527	1.48296	1.47505	3.29404	3.60576e+09	8.45816
2	37.7956	15.0621	1547.7	1	1.99345	-1.62702	3.7239	1.52755	1.48939	1.47359	3.29701	3.60576e+09	8.66426
3	37.7956	15.062	1547.6	1	1.92731	-1.62253	3.89379	1.53007	1.48518	1.47535	3.29702	3.60576e+09	8.94219
3	37.7956	15.062	1547.6	3	1.89576	-1.62352	3.79373	1.52521	1.48312	1.4761	3.29517	3.60576e+09	9.10645
3	37.7956	15.062	1547.6	4	1.85468	-1.68314	3.69778	1.52479	1.4847	1.47672	3.2959	3.60576e+09	9.37482
4	37.7956	15.062	1547.5	4	1.85373	-1.63509	3.65263	1.5234	1.48759	1.47548	3.29533	3.60576e+09	9.86784
4	37.7956	15.062	1547.5	3	1.89091	-1.60561	3.72156	1.52187	1.48177	1.47592	3.29159	3.60576e+09	10.1099
4	37.7956	15.062	1547.5	1	1.98165	-1.56187	3.88413	1.52055	1.48576	1.4738	3.29066	3.60576e+09	10.2669
5	37.7956	15.062	1547.5	1	1.78318	-1.40409	3.60286	1.52108	1.4806	1.47377	3.28819	3.60576e+09	10.6177
5	37.7956	15.062	1547.5	3	1.88197	-1.56128	3.63277	1.52478	1.48153	1.4751	3.29239	3.60576e+09	11.2126
5	37.7956	15.062	1547.5	4	1.8176	-1.59989	3.58336	1.52087	1.48572	1.4728	3.28944	3.60576e+09	11.395
6	37.7956	15.062	1548.3	4	1.77273	-1.62703	3.58636	1.52181	1.48688	1.47157	3.28983	3.60576e+09	11.7389
6	37.7956	15.062	1548.3	3	1.78372	-1.52852	3.60486	1.51976	1.48841	1.47228	3.28927	3.60576e+09	11.9644
6	37.7956	15.062	1548.3	1	2.02245	-1.25072	3.51882	1.51613	1.49864	1.46931	3.29031	3.60576e+09	12.1451
7	37.7956	15.062	1548.9	1	1.80414	-1.55354	3.40914	1.52222	1.4891	1.46795	3.28692	3.60576e+09	12.6362
7	37.7956	15.062	1548.9	3	1.73315	-1.61741	3.58307	1.52258	1.48814	1.47064	3.28903	3.60576e+09	12.9204
7	37.7956	15.062	1548.9	4	1.78175	-1.53643	3.63419	1.5172	1.49905	1.46635	3.28686	3.60576e+09	13.175
8	37.7956	15.062	1548.7	4	1.7588	-1.64511	3.65786	1.51921	1.49453	1.46958	3.28979	3.60576e+09	13.683
8	37.7956	15.062	1548.7	3	1.80702	-1.62472	3.67445	1.51852	1.49634	1.46848	3.28876	3.60576e+09	13.9039
8	37.7956	15.062	1548.7	1	1.88992	-1.7108	3.40558	1.52567	1.48366	1.47278	3.29161	3.60576e+09	14.5662
9	37.7956	15.062	1548.9	1	1.91729	-1.61145	3.82869	1.52822	1.48682	1.47014	3.29168	3.60576e+09	15.0917
9	37.7956	15.062	1548.9	3	1.67134	-1.71726	3.62689	1.52482	1.48881	1.47072	3.29186	3.60576e+09	15.3101
9	37.7956	15.062	1548.9	4	1.67982	-1.78579	3.64921	1.52306	1.48707	1.47116	3.2903	3.60576e+09	15.6663
10	37.7956	15.0619	1551	4	1.7147	-1.71415	3.81697	1.52142	1.49733	1.4678	3.2904	3.60576e+09	16.1513
10	37.7956	15.0619	1551	3	1.59521	-1.91498	3.79096	1.52365	1.48428	1.4714	3.28845	3.60576e+09	16.8751
10	37.7956	15.0619	1551	1	1.50273	-1.87853	3.86222	1.52513	1.49206	1.4676	3.28922	3.60576e+09	17.1093
11	37.7956	15.0619	1552.7	1	1.68888	-1.89797	3.99648	1.52408	1.49329	1.46615	3.28708	3.60576e+09	17.6918
11	37.7956	15.0619	1552.7	3	1.68844	-1.81182	3.94715	1.52593	1.48917	1.46828	3.28835	3.60576e+09	17.8821
11	37.7956	15.0619	1552.7	4	1.71811	-1.79393	3.87249	1.5227	1.49	1.46772	3.28623	3.60576e+09	18.197
12	37.7956	15.0621	1548.3	4	1.9189	-1.67193	3.65755	1.52687	1.48232	1.46971	3.28734	3.60576e+09	19.4769
12	37.7956	15.0621	1548.3	3	1.83532	-1.73085	3.80372	1.5261	1.48365	1.46856	3.2858	3.60576e+09	19.6655
12	37.7956	15.0621	1548.3	1	1.65125	-1.94017	4.01922	1.52526	1.4824	1.47064	3.28713	3.60576e+09	19.8419
13	37.7956	15.0621	1547.1	4	1.6906	-2.01393	3.64247	1.53256	1.4813	1.47424	3.29714	3.60576e+09	42.1626
13	37.7956	15.0621	1547.1	3	1.75054	-1.89017	3.78056	1.53034	1.48503	1.47308	3.29635	3.60576e+09	42.3584
13	37.7956	15.0621	1547.1	1	1.76851	-1.85713	4.01674	1.52998	1.48912	1.4709	3.29592	3.60576e+09	42.5171
14	37.7956	15.0621	1547.5	4	1.74417	-1.72661	3.73369	1.5224	1.49114	1.47402	3.29659	3.60576e+09	42.8136
14	37.7956	15.0621	1547.5	3	1.92671	-1.45494	3.84533	1.52106	1.49518	1.47309	3.29618	3.60576e+09	43.0513
14	37.7956	15.0621	1547.5	1	1.98614	-1.45283	3.78984	1.52209	1.49418	1.47142	3.29422	3.60576e+09	43.5495
15	37.7956	15.062	1548.1	1	2.01007	-1.43282	3.71239	1.52453	1.48844	1.47223	3.29393	3.60576e+09	43.7926
15	37.7956	15.062	1548.1	3	1.69549	-1.74716	3.77173	1.52132	1.48686	1.47511	3.29432	3.60576e+09	43.9136
15	37.7956	15.062	1548.1	4	1.80822	-1.69955	3.67528	1.52405	1.49168	1.47039	3.29426	3.60576e+09	44.083
16	37.7956	15.062	1547.9	4	1.91615	-1.62055	3.55866	1.52526	1.48639	1.47306	3.29454	3.60576e+09	44.7092
16	37.7956	15.062	1547.9	3	1.96319	-1.53696	3.63479	1.52644	1.48916	1.47089	3.29337	3.60576e+09	44.8495
16	37.7956	15.062	1547.9	1	2.02424	-1.53928	3.64156	1.52592	1.49105	1.47068	3.29452	3.60576e+09	44.961
17	37.7956	15.062	1547.6	1	1.99149	-1.45706	3.48007	1.52092	1.49012	1.47097	3.29153	3.60576e+09	45.3646
17	37.7956	15.062	1547.6	3	1.88849	-1.40729	3.60416	1.51773	1.49817	1.47008	3.29304	3.60576e+09	45.5276
17	37.7956	15.062	1547.6	4	1.82184	-1.5608	3.54178	1.52052	1.49166	1.47019	3.29107	3.60576e+09	45.6864
18	37.7956	15.062	1547.5	4	1.675	-1.61724	3.48334	1.52014	1.49182	1.47037	3.29136	3.60576e+09	46.0285
18	37.7956	15.062	1547.5	3	1.80868	-1.45432	3.41909	1.51891	1.49163	1.47121	3.29159	3.60576e+09	46.3399
18	37.7956	15.062	1547.5	1	1.98302	-1.39816	3.41443	1.51841	1.49546	1.46928	3.29151	3.60576e+09	46.4916
19	37.7956	15.0621	1546.9	4	1.71231	-1.86457	3.70268	1.52568	1.48576	1.47093	3.29185	3.60576e+09	46.9534
19	37.7956	15.0621	1546.9	3	1.86044	-1.73839	3.80034	1.52696	1.48274	1.47343	3.29317	3.60576e+09	47.296
19	37.7956	15.0621	1546.9	1	1.95435	-1.7439	3.82709	1.52589	1.48533	1.47117	3.29154	3.60576e+09	47.4268
20	37.7956	15.0621	1546.8	4	1.91043	-1.68013	3.63781	1.52759	1.48291	1.47079	3.29198	3.60576e+09	48.0715
20	37.7956	15.0621	1546.8	3	1.92736	-1.57045	3.76831	1.52427	1.48863	1.46996	3.29219	3.60576e+09	48.2293
20	37.7956	15.0621	1546.8	1	2.03261	-1.48025	3.81918	1.52484	1.49117	1.47009	3.29332	3.60576e+09	48.3461
21	37.7956	15.062	1546.9	4	1.87726	-1.65622	3.61878	1.52349	1.48347	1.47432	3.29278	3.60576e+09	48.7794
21	37.7956	15.062	1546.9	3	1.89923	-1.62077	3.71833	1.52344	1.4868	1.47022	3.29091	3.60576e+09	48.9706
21	37.7956	15.062	1546.9	1	2.0216	-1.58304	3.7525	1.52575	1.48855	1.4706	3.29311	3.60576e+09	49.1293
22	37.7956	15.062	1547.3	1	1.98259	-1.72402	3.6223	1.52479	1.48538	1.4707	3.29151	3.60576e+09	49.3864
22	37.7956	15.062	1547.3	3	1.89407	-1.68377	3.6351	1.5248	1.48313	1.47358	3.29297	3.60576e+09	49.4942
22	37.7956	15.062	1547.3	4	1.84139	-1.66877	3.59475	1.52206	1.48792	1.47236	3.2928	3.60576e+09	49.6383
23	37.7956	15.062	1547.6	4	1.86041	-1.73557	3.47593	1.52618	1.48151	1.47321	3.29326	3.60576e+09	49.8355
23	37.7956	15.062	1547.6	3	1.93911	-1.61713	3.56403	1.52273	1.48751	1.47068	3.29149	3.60576e+09	49.9698
23	37.7956	15.062	1547.6	1	1.99654	-1.57163	3.55126	1.5225	1.4911	1.4712	3.29427	3.60576e+09	50.0804
24	37.7956	15.062	1547.7	1	2.00873	-1.69606	3.48839	1.52612	1.4822	1.47163	3.29195	3.60576e+09	50.3163
24	37.7956	15.062	1547.7	3	1.86715	-1.63778	3.43313	1.52325	1.4856	1.47188	3.29198	3.60576e+09	50.4461
24	37.7956	15.062	1547.7	4	1.73673	-1.66584	3.36802	1.522	1.48466	1.4727	3.29233	3.60576e+09	50.9847
25	37.7957	15.0621	1547.1	4	1.79497	-1.62418	3.75794	1.51931	1.49375	1.47116	3.29354	3.60576e+09	51.6417
25	37.7957	15.0621	1547.1	3	1.87365	-1.67917	3.77263	1.52823	1.48397	1.47107	3.2933	3.60576e+09	51.9373
25	37.7957	15.0621	1547.1	1	2.06877	-1.32553	3.70758	1.53119	1.49975	1.4635	3.295	3.60576e+09	52.0856
26	37.7957	15.062	1548.3	1	1.84819	-1.65284	3.72341	1.52513	1.48561	1.47157	3.29305	3.60576e+09	52.3812
26	37.7957	15.062	1548.3	3	1.85159	-1.70421	3.72707	1.52658	1.48262	1.47259	3.29288	3.60576e+09	52.5953
26	37.7957	15.062	1548.3	4	1.85616	-1.72672	3.6337	1.52603	1.48228	1.47183	3.29193	3.60576e+09	52.7554
27	37.7957	15.062	1548.9	4	1.85217	-1.77514	3.59192	1.5282	1.47775	1.47484	3.29387	3.60576e+09	53.0014
27	37.7957	15.062	1548.9	3	1.86356	-1.70915	3.71404	1.52637	1.48384	1.47173	3.29258	3.60576e+09	53.1927
27	37.7957	15.062	1548.9	1	1.92689	-1.54846	3.78669	1.52341	1.48686	1.47112	3.2914	3.60576e+09	53.3769
28	37.7956	15.062	1549.1	1	1.93082	-1.66089	3.64464	1.52461	1.48666	1.47169	3.29328	3.60576e+09	53.769
28	37.7956	15.062	1549.1	3	1.93135	-1.56314	3.68578	1.52089	1.48962	1.47106	3.29155	3.60576e+09	53.9173
28	37.7956	15.062	1549.1	4	1.86601	-1.72895	3.54373	1.52516	1.48081	1.47313	3.29198	3.60576e+09	54.1444
29	37.7956	15.062	1549.1	4	1.85167	-1.70287	3.51337	1.5233	1.48374	1.47145	3.29097	3.60576e+09	54.3892
29	37.7956	15.062	1549.1	3	1.87107	-1.60851	3.61635	1.52107	1.49205	1.47008	3.29252	3.60576e+09	54.5505
29	37.7956	15.062	1549.1	1	1.93226	-1.5292	3.59446	1.51887	1.49599	1.46835	3.29079	3.60576e+09	54.6918
30	37.7956	15.062	1548.9	1	2.11433	-1.67985	3.28033	1.52939	1.49582	1.46249	3.2911	3.60576e+09	55.048
30	37.7956	15.062	1548.9	3	1.89379	-1.61806	3.4995	1.52168	1.49035	1.47169	3.29345	3.60576e+09	55.2472
30	37.7956	15.062	1548.9	4	1.77719	-1.70852	3.42509	1.52219	1.48557	1.47094	3.2913	3.60576e+09	55.398
31	37.7956	15.062	1548.5	4	1.67787	-1.76704	3.45399	1.52487	1.48021	1.47248	3.29133	3.60576e+09	56.356
31	37.7956	15.062	1548.5	3	1.55881	-1.71511	3.308	1.52387	1.48793	1.46952	3.29219	3.60576e+09	56.5595
31	37.7956	15.062	1548.5	1	2.12839	-1.77915	3.24327	1.52323	1.48952	1.46787	3.29221	3.60576e+09	56.7857
32	37.7957	15.0621	1547	4	1.88235	-1.82357	3.59379	1.52889	1.47289	1.47408	3.28967	3.60576e+09	57.6094
32	37.7957	15.0621	1547	3	1.82991	-1.80092	3.69087	1.52794	1.48029	1.4728	3.29209	3.60576e+09	57.7602
32	37.7957	15.0621	1547	1	2.04332	-1.65842	3.61306	1.52412	1.47997	1.46936	3.28672	3.60576e+09	57.8744
33	37.7957	15.062	1546.7	1	1.81125	-1.66689	3.64745	1.52704	1.48495	1.47099	3.29326	3.60576e+09	58.1332
33	37.7957	15.062	1546.7	3	1.90574	-1.63021	3.69962	1.52546	1.48538	1.47051	3.29204	3.60576e+09	58.2866
33	37.7957	15.062	1546.7	4	1.85836	-1.7878	3.59415	1.52809	1.47756	1.47297	3.29172	3.60576e+09	58.5148
34	37.7957	15.062	1546.6	4	1.85424	-1.8059	3.5749	1.52704	1.47656	1.47392	3.2911	3.60576e+09	58.9042
34	37.7957	15.062	1546.6	3	1.79177	-1.78	3.68339	1.5261	1.48264	1.47221	3.29235	3.60576e+09	59.0972
34	37.7957	15.062	1546.6	1	1.87022	-1.65377	3.71117	1.52709	1.48213	1.47199	3.29245	3.60576e+09	59.2867
35	37.7957	15.062	1547.1	1	1.95762	-1.75178	3.74863	1.52706	1.48277	1.47095	3.29184	3.60576e+09	59.6762
35	37.7957	15.062	1547.1	3	1.8889	-1.69127	3.65935	1.52574	1.4837	1.47046	3.29112	3.60576e+09	59.8033
35	37.7957	15.062	1547.1	4	1.85527	-1.7994	3.53553	1.52726	1.4776	1.47431	3.29193	3.60576e+09	60.0034
36	37.7957	15.062	1547.9	4	1.81165	-1.73983	3.49527	1.52356	1.4811	1.47343	3.29167	3.60576e+09	60.6227
36	37.7957	15.062	1547.9	3	1.89581	-1.627	3.61266	1.52335	1.4913	1.46984	3.29292	3.60576e+09	60.9498
36	37.7957	15.062	1547.9	1	2.0068	-1.4949	3.61994	1.51842	1.49392	1.46665	3.28858	3.60576e+09	61.2402
37	37.7957	15.062	1547.7	4	1.69918	-1.90057	3.42148	1.52597	1.47887	1.47353	3.29254	3.60576e+09	61.7286
37	37.7957	15.062	1547.7	3	1.90633	-1.70428	3.46436	1.52625	1.48782	1.47051	3.29428	3.60576e+09	61.914
37	37.7957	15.062	1547.7	1	2.02588	-1.38718	3.56735	1.5258	1.48948	1.47143	3.29638	3.60576e+09	62.0621
38	37.7956	15.062	1547.7	4	1.72263	-1.89689	3.42467	1.52732	1.48066	1.47218	3.29308	3.60576e+09	62.658
38	37.7956	15.062	1547.7	3	1.67076	-1.85109	3.40589	1.52338	1.48878	1.47137	3.29481	3.60576e+09	62.9596
38	37.7956	15.062	1547.7	1	1.86956	-1.9648	3.24774	1.52946	1.48379	1.47027	3.29387	3.60576e+09	63.2359
39	37.7957	15.0621	1546.8	4	1.87696	-1.74142	3.65625	1.527	1.48251	1.4719	3.29271	3.60576e+09	63.7429
39	37.7957	15.0621	1546.8	3	1.84235	-1.70987	3.75513	1.52498	1.48667	1.47003	3.29178	3.60576e+09	64.2218
39	37.7957	15.0621	1546.8	1	2.03069	-1.64364	3.66413	1.52749	1.48688	1.47167	3.29506	3.60576e+09	64.3665
40	37.7957	15.062	1547.1	1	1.98146	-1.70714	3.58486	1.5264	1.48241	1.47102	3.29169	3.60576e+09	64.793
40	37.7957	15.062	1547.1	3	1.89068	-1.65345	3.71822	1.52239	1.48686	1.47111	3.29163	3.60576e+09	64.9816
40	37.7957	15.062	1547.1	4	1.84988	-1.78033	3.6081	1.52689	1.48099	1.4721	3.29208	3.60576e+09	65.178
41	37.7957	15.062	1547.6	4	1.83687	-1.75102	3.60653	1.52511	1.48255	1.4739	3.29306	3.60576e+09	65.6386
41	37.7957	15.062	1547.6	3	1.89393	-1.76291	3.6488	1.52838	1.47886	1.47334	3.29252	3.60576e+09	66.0684
41	37.7957	15.062	1547.6	1	1.95893	-1.67931	3.6766	1.52803	1.48292	1.47153	3.29289	3.60576e+09	66.3684
42	37.7957	15.062	1547.7	4	1.82072	-1.77112	3.54999	1.52535	1.4808	1.47296	3.29222	3.60576e+09	66.6649
42	37.7957	15.062	1547.7	3	1.88119	-1.79817	3.56142	1.5288	1.47327	1.47448	3.29159	3.60576e+09	67.0403
42	37.7957	15.062	1547.7	1	1.89762	-1.69059	3.53373	1.52603	1.48357	1.47135	3.29217	3.60576e+09	67.2264
43	37.7957	15.062	1547.9	4	1.80474	-1.75525	3.48981	1.52622	1.48318	1.47076	3.29166	3.60576e+09	67.6264
43	37.7957	15.062	1547.9	3	1.85068	-1.69127	3.55046	1.5255	1.48718	1.47003	3.29253	3.60576e+09	67.8362
43	37.7957	15.062	1547.9	1	1.93793	-1.56893	3.53316	1.52005	1.49072	1.46953	3.29051	3.60576e+09	68.0194
44	37.7957	15.062	1548.3	1	1.70932	-1.56822	3.60689	1.52121	1.49718	1.46764	3.29297	3.60576e+09	68.5614
44	37.7957	15.062	1548.3	3	1.62613	-1.55756	3.57395	1.51631	1.49912	1.46624	3.2895	3.60576e+09	68.658
44	37.7957	15.062	1548.3	4	1.67025	-1.71002	3.49459	1.52049	1.49181	1.47018	3.29262	3.60576e+09	68.9351
45	37.7957	15.0621	1548	4	1.78019	-1.77401	3.65089	1.52626	1.48212	1.47358	3.294	3.60576e+09	69.4412
45	37.7957	15.0621	1548	3	1.84149	-1.65006	3.73917	1.52568	1.48567	1.47158	3.29324	3.60576e+09	69.5877
45	37.7957	15.0621	1548	1	1.94933	-1.59927	3.69888	1.52725	1.48573	1.46976	3.29289	3.60576e+09	69.73
46	37.7957	15.062	1548.2	4	1.78991	-1.70483	3.62921	1.52529	1.48774	1.46965	3.29259	3.60576e+09	69.9957
46	37.7957	15.062	1548.2	3	1.74716	-1.75413	3.71211	1.52645	1.48402	1.47134	3.29295	3.60576e+09	70.1747
46	37.7957	15.062	1548.2	1	1.81935	-1.73265	3.66468	1.5283	1.48275	1.47086	3.29301	3.60576e+09	70.3624
47	37.7957	15.062	1548.5	4	1.83074	-1.8879	3.53086	1.53086	1.4709	1.47588	3.29244	3.60576e+09	71.0641
47	37.7957	15.062	1548.5	3	1.86205	-1.85111	3.6318	1.53081	1.47434	1.4745	3.29277	3.60576e+09	71.3676
47	37.7957	15.062	1548.5	1	2.01918	-1.73948	3.77572	1.53293	1.47657	1.47433	3.29469	3.60576e+09	71.5141
48	37.7957	15.062	1548.8	4	1.82043	-1.81986	3.52228	1.52859	1.4785	1.47369	3.29317	3.60576e+09	72.4679
48	37.7957	15.062	1548.8	3	1.87316	-1.69528	3.63396	1.52476	1.48367	1.4723	3.29315	3.60576e+09	72.6283
48	37.7957	15.062	1548.8	1	1.92807	-1.63447	3.58168	1.52618	1.48309	1.47141	3.29198	3.60576e+09	72.7828
49	37.7957	15.062	1547.9	1	1.8953	-1.65366	3.55952	1.52479	1.48641	1.47044	3.29193	3.60576e+09	73.0608
49	37.7957	15.062	1547.9	3	1.79787	-1.78059	3.55648	1.52484	1.48056	1.47319	3.29179	3.60576e+09	73.2055
49	37.7957	15.062	1547.9	4	1.80384	-1.79273	3.48555	1.52639	1.48133	1.47314	3.29334	3.60576e+09	73.3687
50	37.7957	15.0619	1547.9	4	1.69718	-1.79305	3.50734	1.52319	1.48363	1.46962	3.28827	3.60576e+09	77.0136
50	37.7957	15.0619	1547.9	3	1.51461	-1.78677	3.46417	1.52265	1.4821	1.47186	3.28929	3.60576e+09	77.1537
50	37.7957	15.0619	1547.9	1	1.95675	-1.64871	3.3097	1.52262	1.49004	1.46796	3.28968	3.60576e+09	77.3406
51	37.7957	15.0621	1547.6	4	1.82653	-1.79312	3.64417	1.52664	1.47904	1.47258	3.29034	3.60576e+09	77.9433
51	37.7957	15.0621	1547.6	3	1.87851	-1.73196	3.71763	1.52536	1.48167	1.47057	3.28817	3.60576e+09	78.2399
51	37.7957	15.0621	1547.6	1	1.96106	-1.79333	3.55459	1.52644	1.482	1.47103	3.2904	3.60576e+09	78.5145
52	37.7957	15.062	1547.8	1	1.94969	-1.70173	3.66853	1.5264	1.47913	1.4717	3.28886	3.60576e+09	78.8776
52	37.7957	15.062	1547.8	3	1.85138	-1.79728	3.65218	1.52629	1.47677	1.47319	3.28912	3.60576e+09	79.0329
52	37.7957	15.062	1547.8	4	1.83697	-1.83397	3.57055	1.52746	1.47304	1.47337	3.28813	3.60576e+09	79.1935
53	37.7957	15.062	1548.3	4	1.8082	-1.82299	3.55946	1.52637	1.47661	1.47329	3.28878	3.60576e+09	79.6863
53	37.7957	15.062	1548.3	3	1.86108	-1.70468	3.64427	1.52462	1.4816	1.47125	3.28847	3.60576e+09	79.8619
53	37.7957	15.062	1548.3	1	1.87245	-1.66925	3.58318	1.52642	1.48014	1.472	3.29014	3.60576e+09	80.0435
54	37.7957	15.062	1547.7	4	1.79278	-1.82745	3.52813	1.52515	1.47704	1.47293	3.28887	3.60576e+09	80.3453
54	37.7957	15.062	1547.7	3	1.8245	-1.76082	3.59093	1.52391	1.48034	1.47098	3.28698	3.60576e+09	80.7435
54	37.7957	15.062	1547.7	1	1.85541	-1.68537	3.55071	1.52502	1.48458	1.47201	3.2918	3.60576e+09	80.9645
55	37.7957	15.062	1547.7	1	1.96044	-1.6318	3.54257	1.52425	1.48431	1.47099	3.29021	3.60576e+09	81.2952
55	37.7957	15.062	1547.7	3	1.85322	-1.63979	3.60968	1.52168	1.48468	1.47113	3.28892	3.60576e+09	82.3145
55	37.7957	15.062	1547.7	4	1.73968	-1.75895	3.50161	1.52232	1.48163	1.47153	3.28823	3.60576e+09	82.6382
56	37.7957	15.0619	1548	3	1.6535	-1.65521	3.56809	1.51975	1.49316	1.46981	3.29166	3.60576e+09	83.1977
56	37.7957	15.0619	1548	1	1.86057	-1.56708	3.33397	1.5203	1.50153	1.46644	3.29266	3.60576e+09	83.367
56	37.7957	15.0619	1548	4	1.64033	-1.8083	3.48553	1.52295	1.48263	1.46983	3.28832	3.60576e+09	83.6284
57	37.7958	15.0621	1546.4	4	1.78661	-1.75737	3.66333	1.52399	1.48145	1.47178	3.28962	3.60576e+09	84.2363
57	37.7958	15.0621	1546.4	3	1.81468	-1.69033	3.80791	1.52199	1.48874	1.46927	3.28912	3.60576e+09	84.4933
57	37.7958	15.0621	1546.4	1	2.0251	-1.59521	3.82598	1.52474	1.48721	1.46996	3.29048	3.60576e+09	84.71
58	37.7957	15.062	1546.6	1	1.86078	-1.75183	3.62513	1.52876	1.48	1.47316	3.29291	3.60576e+09	84.96
58	37.7957	15.062	1546.6	3	1.8663	-1.78604	3.67322	1.52739	1.47993	1.47309	3.29173	3.60576e+09	85.1302
58	37.7957	15.062	1546.6	4	1.80631	-1.85254	3.585	1.52618	1.47502	1.47198	3.2873	3.60576e+09	85.3417
59	37.7957	15.062	1546.6	4	1.76813	-1.9222	3.53874	1.52826	1.47389	1.4747	3.29003	3.60576e+09	85.6189
59	37.7957	15.062	1546.6	3	1.83452	-1.81869	3.61882	1.5289	1.47968	1.47231	3.29149	3.60576e+09	86.1223
59	37.7957	15.062	1546.6	1	1.84296	-1.75501	3.6575	1.52382	1.48454	1.47039	3.28929	3.60576e+09	86.4382
60	37.7957	15.062	1546	4	1.78408	-1.81154	3.54057	1.5259	1.48088	1.47371	3.29231	3.60576e+09	87.1865
60	37.7957	15.062	1546	3	1.85405	-1.66805	3.63987	1.52212	1.48577	1.47081	3.28988	3.60576e+09	87.3926
60	37.7957	15.062	1546	1	1.92127	-1.84517	3.52802	1.527	1.478	1.47161	3.28952	3.60576e+09	87.5234
61	37.7957	15.062	1546.1	1	2.03251	-1.6229	3.51389	1.52516	1.47985	1.47033	3.288	3.60576e+09	87.8996
61	37.7957	15.062	1546.1	3	1.80266	-1.7982	3.58062	1.52441	1.48201	1.47253	3.29118	3.60576e+09	88.054
61	37.7957	15.062	1546.1	4	1.77918	-1.79756	3.49867	1.5242	1.47954	1.47218	3.28946	3.60576e+09	88.1988
62	37.7957	15.0619	1546.6	1	1.71529	-1.72614	3.43196	1.52631	1.48953	1.46747	3.2915	3.60576e+09	89.3654
62	37.7957	15.0619	1546.6	3	1.636	-1.75855	3.52559	1.52441	1.48628	1.47021	3.29102	3.60576e+09	89.6506
62	37.7957	15.0619	1546.6	4	1.68319	-1.82127	3.49618	1.52475	1.48113	1.47078	3.2888	3.60576e+09	90.1638
63	37.7958	15.0621	1545.1	4	1.75356	-1.67934	3.72198	1.52123	1.4882	1.47014	3.28924	3.60576e+09	90.6358
63	37.7958	15.0621	1545.1	3	1.70625	-1.78521	3.8089	1.52477	1.48106	1.47185	3.28853	3.60576e+09	90.8242
63	37.7958	15.0621	1545.1	1	1.83624	-1.78565	3.8147	1.52424	1.48313	1.46974	3.28809	3.60576e+09	90.9436
64	37.7958	15.062	1545.7	1	1.57183	-2.13795	3.64778	1.52711	1.48158	1.47065	3.29003	3.60576e+09	91.2393
64	37.7958	15.062	1545.7	3	1.83896	-1.78082	3.7253	1.52657	1.47795	1.47255	3.289	3.60576e+09	91.5156
64	37.7958	15.062	1545.7	4	1.7481	-1.80214	3.62035	1.52442	1.48031	1.47189	3.28882	3.60576e+09	91.6629
65	37.7958	15.062	1546.3	4	1.7423	-1.86888	3.57819	1.52795	1.47736	1.4735	3.29094	3.60576e+09	92.0314
65	37.7958	15.062	1546.3	3	1.79661	-1.82325	3.69338	1.52647	1.47655	1.47293	3.28829	3.60576e+09	92.199
65	37.7958	15.062	1546.3	1	1.98166	-1.93626	3.63779	1.52835	1.47765	1.4725	3.28983	3.60576e+09	92.3587
66	37.7958	15.062	1546.8	1	1.86359	-1.99037	3.67924	1.52827	1.47569	1.47206	3.28848	3.60576e+09	92.6446
66	37.7958	15.062	1546.8	3	1.7449	-1.87673	3.62434	1.52695	1.47571	1.47218	3.28824	3.60576e+09	92.7595
66	37.7958	15.062	1546.8	4	1.71985	-1.85514	3.54419	1.52716	1.48119	1.47041	3.28929	3.60576e+09	92.927
67	37.7958	15.0619	1546.8	4	1.73136	-1.80285	3.52533	1.52142	1.48225	1.47146	3.28749	3.60576e+09	93.1604
67	37.7958	15.0619	1546.8	3	1.81834	-1.69102	3.64847	1.52103	1.48256	1.47164	3.28808	3.60576e+09	93.3042
67	37.7958	15.0619	1546.8	1	1.83618	-1.85307	3.60363	1.52452	1.48206	1.47056	3.28881	3.60576e+09	93.428
68	37.7958	15.0619	1547.2	1	1.6771	-1.76986	3.34059	1.52794	1.48035	1.4681	3.28733	3.60576e+09	93.7822
68	37.7958	15.0619	1547.2	3	1.70128	-1.79532	3.55504	1.52473	1.47849	1.4712	3.2873	3.60576e+09	93.9058
68	37.7958	15.0619	1547.2	4	1.68819	-1.83432	3.52636	1.52117	1.48436	1.4714	3.28888	3.60576e+09	94.0401
69	37.7958	15.0619	1547.3	1	1.73777	-1.90094	3.49322	1.52666	1.4828	1.47035	3.29083	3.60576e+09	96.1411
69	37.7958	15.0619	1547.3	3	1.74979	-1.78307	3.49783	1.52838	1.47822	1.47127	3.28984	3.60576e+09	96.298
69	37.7958	15.0619	1547.3	4	1.70019	-1.86869	3.45663	1.52695	1.47747	1.47204	3.28984	3.60576e+09	96.5683
70	37.7957	15.0619	1547.5	4	1.69083	-1.80633	3.47175	1.52351	1.4813	1.47353	3.29131	3.60576e+09	97.0104
70	37.7957	15.0619	1547.5	3	1.68232	-1.77161	3.44968	1.52765	1.48129	1.47324	3.2931	3.60576e+09	97.1622
70	37.7957	15.0619	1547.5	1	1.79277	-1.92614	3.36181	1.52915	1.48426	1.46845	3.29052	3.60576e+09	97.2771
71	37.7957	15.0619	1547.9	1	1.69308	-1.86313	3.22623	1.52774	1.47739	1.47103	3.2894	3.60576e+09	97.7447
71	37.7957	15.0619	1547.9	3	1.6972	-1.85078	3.38655	1.53	1.47384	1.47284	3.2901	3.60576e+09	98.1798
71	37.7957	15.0619	1547.9	4	1.67978	-1.91764	3.42553	1.53022	1.47633	1.47255	3.29073	3.60576e+09	98.4183
72	37.7957	15.0619	1548	4	1.66893	-1.83107	3.44821	1.52512	1.48122	1.47127	3.2893	3.60576e+09	99.1938
72	37.7957	15.0619	1548	3	1.71101	-1.70911	3.4306	1.52076	1.48728	1.46984	3.28889	3.60576e+09	99.4131
72	37.7957	15.0619	1548	1	1.88002	-2.0367	3.50841	1.52447	1.48601	1.4695	3.28972	3.60576e+09	99.5771
73	37.7957	15.0619	1549.5	4	1.65809	-1.79504	3.52453	1.52402	1.48219	1.47017	3.288	3.60576e+09	100.503
73	37.7957	15.0619	1549.5	3	1.66067	-1.63642	3.61419	1.52377	1.4874	1.46786	3.28772	3.60576e+09	100.859
73	37.7957	15.0619	1549.5	1	1.67852	-1.56972	3.64084	1.52422	1.49024	1.46761	3.28894	3.60576e+09	101.038
74	37.7957	15.0619	1550.4	1	1.47448	-1.52394	3.96017	1.52904	1.48486	1.46715	3.28716	3.60576e+09	101.357
74	37.7957	15.0619	1550.4	3	1.56666	-1.65865	3.6076	1.52298	1.48948	1.46578	3.28573	3.60576e+09	101.843
74	37.7957	15.0619	1550.4	4	1.65006	-1.72398	3.606	1.52138	1.49131	1.46602	3.2859	3.60576e+09	102.038
75	37.7957	15.0619	1550.3	4	1.71755	-1.74844	3.55075	1.5237	1.4834	1.46893	3.28656	3.60576e+09	102.538
75	37.7957	15.0619	1550.3	3	1.72101	-1.65357	3.72514	1.52234	1.48786	1.46737	3.28571	3.60576e+09	102.718
75	37.7957	15.0619	1550.3	1	1.64277	-1.36247	4.05066	1.52433	1.49069	1.46636	3.2865	3.60576e+09	102.84
76	37.7957	15.0619	1549.8	4	1.68061	-1.82997	3.50613	1.52482	1.47872	1.47016	3.28531	3.60576e+09	103.291
76	37.7957	15.0619	1549.8	3	1.73114	-1.80142	3.53299	1.52718	1.47831	1.46966	3.2862	3.60576e+09	103.467
76	37.7957	15.0619	1549.8	1	1.5743	-1.66785	3.7092	1.525	1.48632	1.46871	3.2876	3.60576e+09	103.589
77	37.7957	15.0619	1548.1	4	1.68171	-1.76957	3.54775	1.52359	1.48267	1.46961	3.2873	3.60576e+09	104.377
77	37.7957	15.0619	1548.1	3	1.69557	-1.73721	3.58478	1.52431	1.48987	1.46741	3.28848	3.60576e+09	104.58
77	37.7957	15.0619	1548.1	1	1.7769	-1.69201	3.56857	1.51987	1.49402	1.46754	3.28873	3.60576e+09	104.981
78	37.7957	15.0619	1549.1	4	1.68462	-1.81062	3.55139	1.52632	1.48182	1.47125	3.28978	3.60576e+09	105.425
78	37.7957	15.0619	1549.1	3	1.70347	-1.75357	3.59963	1.52765	1.48202	1.47013	3.28904	3.60576e+09	105.664
78	37.7957	15.0619	1549.1	1	1.66798	-1.82337	3.62251	1.52606	1.48329	1.46864	3.28785	3.60576e+09	105.859
79	37.7957	15.0619	1549.2	4	1.71919	-1.86224	3.49994	1.52824	1.47485	1.471	3.2868	3.60576e+09	106.318
79	37.7957	15.0619	1549.2	3	1.76122	-1.77232	3.593	1.52813	1.47752	1.46998	3.28678	3.60576e+09	106.602
79	37.7957	15.0619	1549.2	1	1.92525	-1.67149	3.73842	1.52672	1.48375	1.46833	3.28773	3.60576e+09	106.754
80	37.7957	15.0619	1549.9	4	1.7162	-1.8342	3.5079	1.52869	1.47865	1.47069	3.28846	3.60576e+09	107.098
80	37.7957	15.0619	1549.9	3	1.74978	-1.7782	3.51868	1.52652	1.47934	1.46989	3.28666	3.60576e+09	107.299
80	37.7957	15.0619	1549.9	1	2.05698	-1.8395	3.4825	1.52732	1.48136	1.46811	3.28673	3.60576e+09	107.464
81	37.7957	15.0619	1550.3	4	1.66979	-1.75936	3.55465	1.52436	1.48244	1.47008	3.28778	3.60576e+09	107.861
81	37.7957	15.0619	1550.3	3	1.68359	-1.5931	3.58006	1.52216	1.49407	1.46599	3.28813	3.60576e+09	108.032
81	37.7957	15.0619	1550.3	1	1.72197	-1.95212	3.627	1.51997	1.49483	1.46448	3.28528	3.60576e+09	108.267
82	37.7957	15.0619	1548.7	4	1.72682	-1.82737	3.49345	1.52621	1.47919	1.47132	3.28817	3.60576e+09	108.931
82	37.7957	15.0619	1548.7	3	1.78605	-1.74123	3.58397	1.52324	1.48409	1.46995	3.2875	3.60576e+09	109.136
82	37.7957	15.0619	1548.7	1	1.7631	-1.72638	3.77981	1.52477	1.48808	1.46913	3.28909	3.60576e+09	109.283
83	37.7957	15.0619	1549.1	4	1.65906	-1.81499	3.53001	1.52616	1.47711	1.47072	3.28687	3.60576e+09	109.742
83	37.7957	15.0619	1549.1	3	1.71313	-1.75802	3.52484	1.52675	1.4798	1.46964	3.2874	3.60576e+09	110.005
83	37.7957	15.0619	1549.1	1	2.10733	-1.73853	3.37719	1.53488	1.49095	1.46052	3.28865	3.60576e+09	110.937
84	37.7957	15.0619	1550.3	4	1.6907	-1.65724	3.61742	1.5242	1.4896	1.46626	3.28746	3.60576e+09	112.145
84	37.7957	15.0619	1550.3	3	1.62817	-1.61522	3.66261	1.52249	1.49136	1.46762	3.28895	3.60576e+09	112.4
84	37.7957	15.0619	1550.3	1	1.75378	-1.70958	3.4488	1.5227	1.49186	1.46676	3.28865	3.60576e+09	112.519
85	37.7957	15.0619	1551.9	4	1.67928	-1.7739	3.59496	1.52757	1.47967	1.46966	3.28693	3.60576e+09	113.251
85	37.7957	15.0619	1551.9	3	1.63959	-1.64622	3.67326	1.52643	1.48408	1.46732	3.28647	3.60576e+09	113.438
85	37.7957	15.0619	1551.9	1	1.56519	-1.50596	3.80054	1.52729	1.48657	1.46674	3.28714	3.60576e+09	113.739
86	37.7957	15.0619	1552	1	1.70943	-1.69309	3.53595	1.52849	1.48183	1.46732	3.28658	3.60576e+09	114.091
86	37.7957	15.0619	1552	3	1.73895	-1.7029	3.60046	1.52994	1.48204	1.46689	3.28631	3.60576e+09	114.253
86	37.7957	15.0619	1552	4	1.70239	-1.7905	3.5979	1.52659	1.47974	1.46792	3.28502	3.60576e+09	114.421
87	37.7957	15.0619	1550.8	1	1.48131	-1.77835	3.6423	1.527	1.48372	1.46938	3.28892	3.60576e+09	116.32
87	37.7957	15.0619	1550.8	3	1.64922	-1.77922	3.64868	1.52617	1.48621	1.46971	3.29025	3.60576e+09	117.664
87	37.7957	15.0619	1550.8	4	1.67417	-1.78029	3.64034	1.52518	1.48554	1.47126	3.29206	3.60576e+09	118.207
88	37.7957	15.0619	1551	4	1.69001	-1.78264	3.63626	1.52675	1.48459	1.47013	3.29076	3.60576e+09	118.527
88	37.7957	15.0619	1551	3	1.68609	-1.715	3.76021	1.52745	1.48459	1.47002	3.29044	3.60576e+09	118.916
88	37.7957	15.0619	1551	1	1.72778	-1.51379	4.03987	1.53092	1.48697	1.46869	3.29258	3.60577e+09	119.233
89	37.7957	15.0619	1550.8	4	1.7343	-1.79481	3.64024	1.5274	1.48384	1.46931	3.2887	3.60577e+09	120.1
89	37.7957	15.0619	1550.8	3	1.74528	-1.87726	3.70886	1.53176	1.47406	1.47122	3.28708	3.60577e+09	120.383
89	37.7957	15.0619	1550.8	1	1.87485	-1.90735	3.56184	1.52821	1.48315	1.46893	3.28895	3.60577e+09	120.571
90	37.7957	15.0619	1550.6	4	1.74625	-1.79811	3.61965	1.53179	1.48107	1.46908	3.28947	3.60577e+09	121.262
90	37.7957	15.0619	1550.6	3	1.75704	-1.66151	3.75661	1.52537	1.4903	1.46538	3.28709	3.60577e+09	121.552
90	37.7957	15.0619	1550.6	1	1.84523	-1.77825	3.80673	1.53365	1.4951	1.4604	3.2878	3.60577e+09	122.201
91	37.7957	15.0619	1550.8	4	1.74144	-1.72767	3.63693	1.52626	1.48548	1.46803	3.28793	3.60577e+09	122.768
91	37.7957	15.0619	1550.8	3	1.78026	-1.6987	3.69465	1.52759	1.48251	1.46819	3.28683	3.60577e+09	123.006
91	37.7957	15.0619	1550.8	1	1.89331	-1.74913	3.69799	1.52804	1.48376	1.46781	3.28754	3.60577e+09	123.294
92	37.7956	15.0619	1552.7	4	1.72319	-1.77307	3.6418	1.52915	1.48077	1.4693	3.28731	3.60577e+09	124.611
92	37.7956	15.0619	1552.7	3	1.74732	-1.70941	3.72733	1.5289	1.48239	1.46988	3.28827	3.60577e+09	124.804
92	37.7956	15.0619	1552.7	1	1.56706	-1.6939	3.86704	1.52793	1.48626	1.46703	3.28661	3.60577e+09	125.044
93	37.7956	15.0619	1551.7	4	1.68932	-1.73523	3.62786	1.52446	1.48408	1.4678	3.2846	3.60577e+09	125.711
93	37.7956	15.0619	1551.7	3	1.61941	-1.70445	3.60384	1.52625	1.48664	1.46828	3.28842	3.60577e+09	126.087
93	37.7956	15.0619	1551.7	1	1.51532	-1.96867	3.96643	1.52473	1.48303	1.46936	3.28521	3.60577e+09	126.341
94	37.7956	15.0619	1549.5	4	1.72718	-1.86713	3.51609	1.52622	1.47375	1.47168	3.28471	3.60577e+09	127.038
94	37.7956	15.0619	1549.5	3	1.7782	-1.86056	3.54849	1.52904	1.48129	1.47043	3.28964	3.60577e+09	127.821
94	37.7956	15.0619	1549.5	1	2.06078	-1.71166	3.3905	1.52371	1.48294	1.46814	3.28548	3.60577e+09	128.126
95	37.7956	15.0619	1548.5	4	1.75557	-1.84348	3.4903	1.5272	1.48451	1.46623	3.28667	3.60577e+09	129.083
95	37.7956	15.0619	1548.5	3	1.72843	-1.72506	3.50427	1.51971	1.49884	1.46618	3.2896	3.60577e+09	129.299
95	37.7956	15.0619	1548.5	1	1.93662	-1.67751	3.2033	1.52314	1.48457	1.46875	3.288	3.60577e+09	129.585
96	37.7957	15.0619	1547.1	1	1.93327	-1.72969	3.25715	1.52098	1.48544	1.46863	3.28662	3.60577e+09	130.128
96	37.7957	15.0619	1547.1	3	1.6947	-1.7628	3.43684	1.52342	1.4849	1.47	3.28942	3.60577e+09	130.24
96	37.7957	15.0619	1547.1	4	1.64402	-1.80932	3.48327	1.51969	1.4884	1.46998	3.28919	3.60577e+09	130.35
97	37.7956	15.0619	1548.5	1	1.70865	-1.66937	3.6035	1.52685	1.48615	1.4686	3.29021	3.60577e+09	131.078
97	37.7956	15.0619	1548.5	3	1.64503	-1.78052	3.52449	1.52622	1.48215	1.47032	3.28932	3.60577e+09	131.2
97	37.7956	15.0619	1548.5	4	1.68964	-1.67141	3.57955	1.52213	1.49056	1.46765	3.28863	3.60577e+09	131.38
98	37.7956	15.0619	1549.7	4	1.67086	-1.76563	3.5598	1.52973	1.48382	1.46964	3.29212	3.60577e+09	131.768
98	37.7956	15.0619	1549.7	3	1.65963	-1.62367	3.65246	1.52374	1.48958	1.46799	3.28967	3.60577e+09	131.985
98	37.7956	15.0619	1549.7	1	1.80657	-1.51537	3.59533	1.52279	1.49584	1.46608	3.28993	3.60577e+09	132.124
99	37.7956	15.0619	1551.1	4	1.64211	-1.83069	3.58802	1.52976	1.47992	1.47092	3.29089	3.60577e+09	132.759
99	37.7956	15.0619	1551.1	3	1.57811	-1.73469	3.68309	1.52669	1.48658	1.46771	3.28936	3.60577e+09	132.92
99	37.7956	15.0619	1551.1	1	1.71345	-1.67539	3.95137	1.52844	1.49341	1.46711	3.29262	3.60577e+09	133.101
100	37.7956	15.0619	1551.1	4	1.67478	-1.77103	3.68026	1.53043	1.48084	1.47007	3.29066	3.60577e+09	133.64
100	37.7956	15.0619	1551.1	3	1.65643	-1.73106	3.77812	1.53202	1.48064	1.47026	3.29203	3.60577e+09	133.802
100	37.7956	15.0619	1551.1	1	1.56193	-1.80094	3.70512	1.52584	1.49264	1.46736	3.29236	3.60577e+09	134.029
101	37.7956	15.0619	1551.8	4	1.69614	-1.68778	3.79749	1.52745	1.49037	1.46933	3.29273	3.60577e+09	134.763
101	37.7956	15.0619	1551.8	3	1.61572	-1.53292	3.85364	1.52608	1.49686	1.46665	3.29287	3.60577e+09	134.955
101	37.7956	15.0619	1551.8	1	1.75257	-1.80934	4.27506	1.52282	1.49512	1.47129	3.29374	3.60577e+09	135.182
102	37.7956	15.0619	1550.5	1	1.78277	-1.53529	3.67887	1.52985	1.48231	1.46858	3.28919	3.60577e+09	136.042
102	37.7956	15.0619	1550.5	3	1.67493	-1.70481	3.67601	1.52983	1.48257	1.46997	3.29051	3.60577e+09	136.389
102	37.7956	15.0619	1550.5	4	1.66458	-1.59476	3.73679	1.52288	1.49418	1.46659	3.28922	3.60577e+09	136.711
103	37.7956	15.0619	1550.9	4	1.69498	-1.78737	3.56433	1.53052	1.47706	1.47291	3.29097	3.60577e+09	137.117
103	37.7956	15.0619	1551	3	1.69341	-1.69823	3.66746	1.52704	1.48336	1.46914	3.2883	3.60577e+09	137.656
103	37.7956	15.0619	1551	1	1.46564	-1.81985	3.37121	1.52234	1.49224	1.46653	3.28826	3.60577e+09	137.895
104	37.7956	15.0619	1550.3	1	1.69579	-1.70119	3.6269	1.52714	1.48082	1.46921	3.28663	3.60577e+09	138.261
104	37.7956	15.0619	1550.3	3	1.72151	-1.63515	3.69919	1.52564	1.47891	1.47003	3.28588	3.60577e+09	138.478
104	37.7956	15.0619	1550.3	4	1.72167	-1.69125	3.59248	1.52322	1.48535	1.47077	3.28869	3.60577e+09	138.709
105	37.7956	15.062	1549.3	4	1.69631	-1.7582	3.55704	1.52371	1.47546	1.47062	3.28313	3.60577e+09	140.726
105	37.7956	15.062	1549.3	3	1.67926	-1.7966	3.54984	1.52453	1.47313	1.47027	3.28177	3.60577e+09	141.052
105	37.7956	15.062	1549.3	1	1.64222	-1.82808	3.46825	1.5208	1.48022	1.46794	3.28122	3.60577e+09	141.364
106	37.7956	15.062	1548.3	1	1.39894	-1.74237	3.54267	1.52412	1.47268	1.46952	3.28067	3.60577e+09	141.874
106	37.7956	15.062	1548.3	3	1.69809	-1.67253	3.6681	1.5169	1.48693	1.4676	3.28154	3.60577e+09	142.488
106	37.7956	15.062	1548.3	4	1.71722	-1.88931	3.5717	1.52347	1.46975	1.47298	3.28153	3.60577e+09	142.939
107	37.7956	15.0619	1548.5	4	1.72625	-1.66391	3.65722	1.51959	1.484	1.46944	3.28333	3.60577e+09	143.22
107	37.7956	15.0619	1548.5	3	1.73472	-1.74419	3.67801	1.52131	1.48033	1.4677	3.2801	3.60577e+09	143.581
107	37.7956	15.0619	1548.5	1	1.89641	-1.93953	3.84905	1.52713	1.47885	1.46662	3.28074	3.60577e+09	143.781
108	37.7956	15.0619	1549.5	4	1.67741	-1.77993	3.616	1.52364	1.48164	1.46498	3.27929	3.60577e+09	144.231
108	37.7956	15.0619	1549.5	3	1.56002	-1.83176	3.63439	1.52421	1.47787	1.4682	3.2817	3.60577e+09	144.484
108	37.7956	15.0619	1549.5	1	1.78673	-1.71374	3.52857	1.52335	1.4838	1.4662	3.28223	3.60577e+09	144.606
109	37.7956	15.0619	1550.2	4	1.67225	-1.75685	3.70289	1.52452	1.48313	1.46536	3.28077	3.60577e+09	144.994
109	37.7956	15.0619	1550.2	3	1.53654	-1.72507	3.76328	1.52174	1.48558	1.46689	3.28222	3.60577e+09	145.187
109	37.7956	15.0619	1550.2	1	1.31772	-1.82095	3.72498	1.5227	1.48753	1.4642	3.28114	3.60577e+09	145.397
110	37.7956	15.0619	1551.1	4	1.72233	-1.73542	3.78654	1.52476	1.48252	1.46648	3.28177	3.60577e+09	145.812
110	37.7956	15.0619	1551.1	3	1.67187	-1.65932	3.97994	1.52292	1.4902	1.46562	3.28366	3.60577e+09	145.957
110	37.7956	15.0619	1551.1	1	1.76845	-1.82879	3.91976	1.52727	1.48323	1.46545	3.28216	3.60577e+09	146.2

## Sheet: Paleomagnetic directions
		5 cm above ground							100 cm above ground							180 cm above ground
location		lat (degrees N)	long (degrees E)	elev (m asl)	inc (degrees)	dec (degrees)	int (microT)		lat (degrees N)	long (degrees E)	elev (m asl)	inc (degrees)	dec (degrees)	int (microT)		lat (degrees N)	long (degrees E)	elev (m asl)	inc (degrees)	dec (degrees)	int (microT)
1		37.7956	15.0621	1546.6	55.5885	-1.63263	46.8888		37.7956	15.0621	1546.6	55.5441	-2.13656	45.212		37.7956	15.0621	1546.6	54.8572	-2.05376	44.368
2		37.7956	15.0621	1547.7	55.1579	2.03563	45.2642		37.7956	15.0621	1547.7	56.2801	0.46281	45.4554		37.7956	15.0621	1547.7	55.4239	-1.05087	44.7725
3		37.7956	15.062	1547.6	57.5873	2.54758	46.3775		37.7956	15.062	1547.6	56.5214	2.19821	45.4116		37.7956	15.062	1547.6	55.4218	-0.123714	44.6614
4		37.7956	15.062	1547.5	56.1212	4.43815	46.3172		37.7956	15.062	1547.5	55.6335	3.00234	44.7253		37.7956	15.062	1547.5	55.0135	0.233925	44.1039
5		37.7956	15.062	1547.5	57.4479	5.67371	42.5815		37.7956	15.062	1547.5	56.3294	3.49658	43.7909		37.7956	15.062	1547.5	55.0154	0.304198	43.2479
6		37.7956	15.062	1548.3	53.6647	7.86738	42.4696		37.7956	15.062	1548.3	55.7458	1.09244	43.0268		37.7956	15.062	1548.3	55.2574	-1.20332	43.1877
7		37.7956	15.062	1548.9	54.4441	0.619403	41.582		37.7956	15.062	1548.9	56.0306	-1.61065	42.963		37.7956	15.062	1548.9	54.5494	-2.37385	43.2927
8		37.7956	15.062	1548.7	53.3356	1.02661	42.5402		37.7956	15.062	1548.7	54.5063	-1.958	44.053		37.7956	15.062	1548.7	54.6641	-3.05428	43.7946
9		37.7956	15.062	1548.9	57.1444	2.17501	45.7512		37.7956	15.062	1548.9	56.2154	-4.21996	43.4704		37.7956	15.062	1548.9	55.3595	-5.10329	43.9631
10		37.7956	15.0619	1551	57.4403	-10.2178	45.5015		37.7956	15.0619	1551	56.4336	-7.39655	45.3687		37.7956	15.0619	1551	55.6081	-5.55868	45.2192
11		37.7956	15.0619	1552.7	56.7253	-7.53183	47.3566		37.7956	15.0619	1552.7	57.8202	-5.91677	46.5977		37.7956	15.0619	1552.7	56.3438	-5.54806	46.0068
12		37.7956	15.0621	1548.3	58.0554	-7.85896	47.5868		37.7956	15.0621	1548.3	56.7552	-2.78788	45.6427		37.7956	15.0621	1548.3	55.5777	-0.535548	44.5592
13		37.7956	15.0621	1547.1	57.7154	-5.56819	47.6558		37.7956	15.0621	1547.1	56.2973	-5.78145	45.749		37.7956	15.0621	1547.1	55.2701	-8.3885	44.924
14		37.7956	15.0621	1547.5	55.7243	4.23269	45.1867		37.7956	15.0621	1547.5	56.2228	2.99639	45.4044		37.7956	15.0621	1547.5	55.293	-3.93412	44.6808
15		37.7956	15.062	1548.1	55.8851	6.48817	44.5816		37.7956	15.062	1548.1	56.2635	-3.28202	44.8923		37.7956	15.062	1548.1	54.9024	-2.99624	44.3461
16		37.7956	15.062	1547.9	54.6358	4.23938	44.4161		37.7956	15.062	1547.9	55.2713	3.2417	44.0773		37.7956	15.062	1547.9	54.3733	1.59367	43.5452
17		37.7956	15.062	1547.6	53.5793	5.70031	42.6614		37.7956	15.062	1547.6	54.7633	3.07081	43.0544		37.7956	15.062	1547.6	54.3986	-0.000535562	42.7778
18		37.7956	15.062	1547.5	52.7971	5.65614	41.8874		37.7956	15.062	1547.5	54.3076	2.59069	41.3238		37.7956	15.062	1547.5	54.6093	-3.12804	41.8984
19		37.7956	15.0621	1546.9	55.6895	0.141696	46.376		37.7956	15.0621	1546.9	56.6352	-0.890463	45.7448		37.7956	15.0621	1546.9	55.386	-6.614	44.8536
20		37.7956	15.0621	1546.8	56.0809	4.87871	45.7261		37.7956	15.0621	1546.8	56.1496	1.72235	45.1455		37.7956	15.0621	1546.8	55.3608	0.195538	44.3917
21		37.7956	15.062	1546.9	55.3799	3.86383	45.4688		37.7956	15.062	1546.9	55.5709	1.27925	44.7883		37.7956	15.062	1546.9	54.8785	1.18421	44.0031
22		37.7956	15.062	1547.3	53.9528	2.0077	44.7481		37.7956	15.062	1547.3	55.1086	1.78812	44.3131		37.7956	15.062	1547.3	54.327	-0.130646	43.7009
23		37.7956	15.062	1547.6	53.4256	4.282	43.6666		37.7956	15.062	1547.6	53.952	2.68355	43.6779		37.7956	15.062	1547.6	53.9569	0.398773	43.076
24		37.7956	15.062	1547.7	53.3218	3.91865	43.6812		37.7956	15.062	1547.7	53.6852	1.93009	42.3733		37.7956	15.062	1547.7	53.7237	-0.639659	41.3942
25		37.7957	15.0621	1547.1	56.5304	5.58389	44.4781		37.7957	15.0621	1547.1	56.7707	0.261153	45.3464		37.7957	15.0621	1547.1	55.2489	-1.8121	44.7012
26		37.7957	15.062	1548.3	56.2283	1.34418	44.7342		37.7957	15.062	1548.3	56.3719	0.580223	44.9709		37.7957	15.062	1548.3	55.2226	-0.216997	44.3065
27		37.7957	15.062	1548.9	56.4196	4.44017	45.2213		37.7957	15.062	1548.9	55.8758	0.763858	44.9312		37.7957	15.062	1548.9	55.2311	0.573413	44.1402
28		37.7956	15.062	1549.1	54.7601	2.98967	44.4636		37.7956	15.062	1549.1	54.9173	3.60705	44.4505		37.7956	15.062	1549.1	54.4215	1.13174	43.6226
29		37.7956	15.062	1549.1	53.777	3.41177	43.5801		37.7956	15.062	1549.1	54.5469	1.54414	43.7792		37.7956	15.062	1549.1	54	0.824379	43.2114
30		37.7956	15.062	1548.9	50.5308	2.53456	42.4887		37.7956	15.062	1548.9	53.6371	2.41827	42.9547		37.7956	15.062	1548.9	53.5203	-0.615221	42.2004
31		37.7956	15.062	1548.5	48.8312	3.22027	42.6781		37.7956	15.062	1548.5	54.5359	-4.69201	40.391		37.7956	15.062	1548.5	54.96	-2.13682	42.2702
32		37.7957	15.0621	1547	54.298	4.54879	44.6987		37.7957	15.0621	1547	56.1304	-1.08906	44.9604		37.7957	15.0621	1547	55.3218	0.404081	44.4792
33		37.7957	15.062	1546.7	56.2378	0.709049	44.0034		37.7957	15.062	1546.7	55.8731	2.11008	44.6952		37.7957	15.062	1546.7	55.1942	-0.0135158	44.2353
34		37.7957	15.062	1546.6	56.5509	2.89427	44.7275		37.7957	15.062	1546.6	55.9434	-1.08909	44.6612		37.7957	15.062	1546.6	54.8791	0.334029	44.1355
35		37.7957	15.062	1547.1	55.4443	2.61956	45.7747		37.7957	15.062	1547.1	55.4164	1.88086	44.5187		37.7957	15.062	1547.1	54.5309	0.757509	43.7948
36		37.7957	15.062	1547.9	53.7818	5.62171	44.0067		37.7957	15.062	1547.9	54.5783	2.11741	43.9233		37.7957	15.062	1547.9	54.1316	0.896843	43.0419
37		37.7957	15.062	1547.7	55.0535	9.60553	43.3064		37.7957	15.062	1547.7	53.5343	1.78012	43.0586		37.7957	15.062	1547.7	53.7504	-3.06569	42.6684
38		37.7956	15.062	1547.7	50.8798	-1.89694	42.3125		37.7956	15.062	1547.7	53.176	-4.08291	42.2115		37.7956	15.062	1547.7	53.6584	-3.15317	42.7715
39		37.7957	15.0621	1546.8	54.5955	4.44852	45.0012		37.7957	15.0621	1546.8	55.9455	-0.146535	45.1873		37.7957	15.0621	1546.8	55.2315	0.389678	44.636
40		37.7957	15.062	1547.1	54.2678	3.79076	44.3753		37.7957	15.062	1547.1	55.3087	2.26795	44.8707		37.7957	15.062	1547.1	54.9341	0.089835	44.2833
41		37.7957	15.062	1547.6	55.4917	4.3829	44.9165		37.7957	15.062	1547.6	55.5421	2.48315	44.7309		37.7957	15.062	1547.6	54.7685	0.968364	44.099
42		37.7957	15.062	1547.7	54.4975	3.50963	43.5273		37.7957	15.062	1547.7	55.2673	3.14613	44.109		37.7957	15.062	1547.7	54.5497	0.841212	43.6512
43		37.7957	15.062	1547.9	53.5783	5.09112	43.2439		37.7957	15.062	1547.9	54.6635	1.68195	43.464		37.7957	15.062	1547.9	54.2897	0.262275	43.0312
44		37.7957	15.062	1548.3	55.6002	0.34387	42.8844		37.7957	15.062	1548.3	55.0048	-1.66162	42.2415		37.7957	15.062	1548.3	54.0017	-2.16288	42.3392
45		37.7957	15.0621	1548	55.96	4.65329	44.7653		37.7957	15.0621	1548	56.4118	2.02619	44.8276		37.7957	15.0621	1548	55.5646	-0.498305	44.3229
46		37.7957	15.062	1548.2	56.2165	1.4779	44.4319		37.7957	15.062	1548.2	56.5454	-0.648112	44.6198		37.7957	15.062	1548.2	55.2696	-0.462993	43.9106
47		37.7957	15.062	1548.5	56.4789	6.41852	46.2158		37.7957	15.062	1548.5	55.8526	2.03387	44.815		37.7957	15.062	1548.5	55.173	1.32663	44.0258
48		37.7957	15.062	1548.8	55.0606	5.65908	43.8376		37.7957	15.062	1548.8	55.1448	3.42576	44.2588		37.7957	15.062	1548.8	54.6548	1.02578	43.6261
49		37.7957	15.062	1547.9	54.5711	4.26225	43.5855		37.7957	15.062	1547.9	54.7384	1.64126	43.6479		37.7957	15.062	1547.9	54.105	0.88254	43.1472
50		37.7957	15.0619	1547.9	51.5866	4.50404	41.8345		37.7957	15.0619	1547.9	55.9436	-3.61525	41.8175		37.7957	15.0619	1547.9	54.5312	-1.5877	42.8916
51		37.7957	15.0621	1547.6	53.6971	2.77783	44.3812		37.7957	15.0621	1547.6	55.7252	2.09362	45.1101		37.7957	15.0621	1547.6	55.4627	0.59782	44.5325
52		37.7957	15.062	1547.8	55.51	5.21394	44.8946		37.7957	15.062	1547.8	55.7215	2.24702	44.7171		37.7957	15.062	1547.8	55.2439	1.60166	44.1437
53		37.7957	15.062	1548.3	55.6076	5.04518	43.7397		37.7957	15.062	1548.3	55.5242	3.36576	44.3287		37.7957	15.062	1548.3	54.958	1.26869	43.8892
54		37.7957	15.062	1547.7	54.765	4.13456	43.4632		37.7957	15.062	1547.7	54.9421	2.40782	43.9592		37.7957	15.062	1547.7	54.5775	1.23158	43.5905
55		37.7957	15.062	1547.7	54.1713	6.68902	43.653		37.7957	15.062	1547.7	55.1386	4.47425	43.7642		37.7957	15.062	1547.7	54.4721	0.823955	42.8738
56		37.7957	15.0619	1548	51.7995	3.21327	41.2708		37.7957	15.0619	1548	55.3821	-0.39242	42.6674		37.7957	15.0619	1548	54.7222	-1.88743	42.5553
57		37.7958	15.0621	1546.4	55.8209	6.60031	46.1344		37.7958	15.0621	1546.4	56.1295	1.05323	45.4428		37.7958	15.0621	1546.4	55.5717	0.727994	44.385
58		37.7957	15.062	1546.6	55.7287	3.63096	44.3543		37.7957	15.062	1546.6	55.9245	2.5074	44.9061		37.7957	15.062	1546.6	55.1209	0.797468	44.2118
59		37.7957	15.062	1546.6	55.0762	2.58805	44.5577		37.7957	15.062	1546.6	55.5914	1.77948	44.4623		37.7957	15.062	1546.6	54.8723	0.0713523	43.9816
60		37.7957	15.062	1546	53.8816	3.88327	44.2073		37.7957	15.062	1546	54.887	4.1445	44.1232		37.7957	15.062	1546	54.5275	1.3887	43.5893
61		37.7957	15.062	1546.1	53.9629	8.9475	43.7176		37.7957	15.062	1546.1	54.8195	2.14522	43.9362		37.7957	15.062	1546.1	54.2961	1.73772	43.1711
62		37.7957	15.0619	1546.6	54.4835	0.536876	42.0716		37.7957	15.0619	1546.6	55.6469	-0.860622	42.6601		37.7957	15.0619	1546.6	54.7842	-0.508121	42.8643
63		37.7958	15.0621	1545.1	56.2616	1.73206	45.9481		37.7958	15.0621	1545.1	57.3361	-0.163694	45.3938		37.7958	15.0621	1545.1	55.8125	0.495899	44.439
64		37.7958	15.062	1545.7	54.7254	-7.09949	45.1085		37.7958	15.062	1545.7	56.3643	3.1493	45.2006		37.7958	15.062	1545.7	55.4036	0.484099	44.0573
65		37.7958	15.062	1546.3	53.8718	3.82578	45.727		37.7958	15.062	1546.3	56.0766	2.7524	44.9368		37.7958	15.062	1546.3	55.3787	0.537598	43.9679
66		37.7958	15.062	1546.8	54.8855	1.95542	45.7945		37.7958	15.062	1546.8	55.8456	1.43537	44.3877		37.7958	15.062	1546.8	54.9671	-0.338509	43.5439
67		37.7958	15.0619	1546.8	54.3577	2.70315	44.4877		37.7958	15.0619	1546.8	55.4199	4.80481	44.1331		37.7958	15.0619	1546.8	54.2004	1.136	43.2155
68		37.7958	15.0619	1547.2	54.892	1.2858	41.3578		37.7958	15.0619	1547.2	55.674	1.90843	43.308		37.7958	15.0619	1547.2	54.0082	-0.0857168	43.1855
69		37.7958	15.0619	1547.3	54.0927	0.679023	43.4004		37.7958	15.0619	1547.3	55.5864	3.02593	42.9837		37.7958	15.0619	1547.3	54.6303	0.751127	42.8146
70		37.7957	15.0619	1547.5	52.7028	0.635549	42.6917		37.7957	15.0619	1547.5	55.458	2.13347	42.2718		37.7957	15.0619	1547.5	54.3694	1.63233	42.6319
71		37.7957	15.0619	1547.9	53.2309	1.64336	40.9223		37.7957	15.0619	1547.9	55.1718	2.25446	42.1599		37.7957	15.0619	1547.9	54.731	0.0222498	42.7004
72		37.7957	15.0619	1548	51.5785	0.981894	44.7119		37.7957	15.0619	1548	53.9576	2.85922	41.9733		37.7957	15.0619	1548	54.4702	0.733702	42.4598
73		37.7957	15.0619	1549.5	57.2572	2.90745	43.0549		37.7957	15.0619	1549.5	56.8279	1.45682	43.0094		37.7957	15.0619	1549.5	55.2063	-0.303707	42.888
74		37.7957	15.0619	1550.4	62.6113	0.64219	44.9215		37.7957	15.0619	1550.4	57.062	-1.16895	42.6853		37.7957	15.0619	1550.4	55.2148	-1.31669	43.2413
75		37.7957	15.0619	1550.3	61.8413	5.82486	45.7852		37.7957	15.0619	1550.3	56.7644	2.30882	44.2412		37.7957	15.0619	1550.3	55.2094	1.27817	43.145
76		37.7957	15.0619	1549.8	58.2648	0.630021	43.61		37.7957	15.0619	1549.8	55.8452	1.95836	43.2712		37.7957	15.0619	1549.8	55.1431	0.397923	42.9723
77		37.7957	15.0619	1548.1	53.9935	1.18923	43.307		37.7957	15.0619	1548.1	55.4679	-1.08503	43.2938		37.7957	15.0619	1548.1	55.3188	-0.570651	43.0651
78		37.7957	15.0619	1549.1	56.1396	-0.989615	43.8513		37.7957	15.0619	1549.1	56.466	0.630036	43.5134		37.7957	15.0619	1549.1	55.4244	-0.719663	43.2767
79		37.7957	15.0619	1549.2	56.1989	5.65087	45.2507		37.7957	15.0619	1549.2	56.4221	2.11174	43.7638		37.7957	15.0619	1549.2	55.4084	0.140693	43.2124
80		37.7957	15.0619	1549.9	52.4257	5.28364	44.4328		37.7957	15.0619	1549.9	55.3663	1.82896	43.1334		37.7957	15.0619	1549.9	55.3762	0.0489508	43.1451
81		37.7957	15.0619	1550.3	52.7743	-3.61896	44.6442		37.7957	15.0619	1550.3	55.9398	0.940106	42.6489		37.7957	15.0619	1550.3	55.6655	0.146975	43.0338
82		37.7957	15.0619	1548.7	56.6253	0.720718	45.1396		37.7957	15.0619	1548.7	54.9884	1.24664	43.6654		37.7957	15.0619	1548.7	54.8097	-0.649296	43.0411
83		37.7957	15.0619	1549.1	52.3493	3.69555	43.4382		37.7957	15.0619	1549.1	55.998	0.415487	42.9534		37.7957	15.0619	1549.1	55.9245	-1.15811	43.0205
84		37.7957	15.0619	1550.3	53.7594	0.344115	42.2997		37.7957	15.0619	1550.3	57.1255	-0.670795	43.2141		37.7957	15.0619	1550.3	56.119	-0.769302	43.2326
85		37.7957	15.0619	1551.9	60.6223	1.30674	43.7743		37.7957	15.0619	1551.9	58.0716	0.221178	43.4639		37.7957	15.0619	1551.9	56.5613	-0.520538	43.4631
86		37.7957	15.0619	1552	56.754	1.65533	42.7687		37.7957	15.0619	1552	57.198	1.12614	43.4593		37.7957	15.0619	1552	56.1823	-0.527638	43.645
87		37.7957	15.0619	1550.8	58.0871	-5.00996	43.1545		37.7957	15.0619	1550.8	56.3043	-2.70323	43.816		37.7957	15.0619	1550.8	55.8157	-2.24646	43.8456
88		37.7957	15.0619	1551	61.1235	3.25573	46.473		37.7957	15.0619	1551	57.7738	-0.72827	44.6355		37.7957	15.0619	1551	56.0206	-2.11819	43.882
89		37.7957	15.0619	1550.8	53.8452	-0.0833698	44.5418		37.7957	15.0619	1550.8	57.3506	-0.486701	45.0841		37.7957	15.0619	1550.8	55.8548	-1.5616	44.1367
90		37.7957	15.0619	1550.6	56.643	-2.38312	45.8893		37.7957	15.0619	1550.6	56.7727	-0.0361331	44.6765		37.7957	15.0619	1550.6	56.5125	-0.988801	44.0278
91		37.7957	15.0619	1550.8	55.8378	2.86265	45.0768		37.7957	15.0619	1550.8	56.9856	1.69135	44.3907		37.7957	15.0619	1550.8	56.0017	-0.353409	43.8688
92		37.7956	15.0619	1552.7	59.6544	-3.11631	45.0322		37.7956	15.0619	1552.7	57.6953	0.492548	44.5737		37.7956	15.0619	1552.7	56.7153	-1.24321	44.018
93		37.7956	15.0619	1551.7	58.2843	-7.29631	46.8021		37.7956	15.0619	1551.7	57.2305	-2.88375	43.0294		37.7956	15.0619	1551.7	56.2012	-2.09675	43.619
94		37.7956	15.0619	1549.5	51.8323	5.17158	43.2112		37.7956	15.0619	1549.5	55.3665	-1.68759	43.8355		37.7956	15.0619	1549.5	55.2766	-1.33221	43.3961
95		37.7956	15.0619	1548.5	51.1929	3.76584	41.0191		37.7956	15.0619	1548.5	53.2592	-3.37321	42.712		37.7956	15.0619	1548.5	54.1538	-3.33824	43.2003
96		37.7957	15.0619	1547.1	50.9445	2.63143	41.6394		37.7957	15.0619	1547.1	54.3637	-1.88318	42.1798		37.7957	15.0619	1547.1	53.5774	-4.20103	42.5554
97		37.7956	15.0619	1548.5	56.6974	-0.642674	43.2336		37.7956	15.0619	1548.5	55.9945	-3.1537	42.7767		37.7956	15.0619	1548.5	55.2861	-2.69526	42.967
98		37.7956	15.0619	1549.7	55.6054	1.80191	42.9958		37.7956	15.0619	1549.7	56.8047	-1.56746	43.2795		37.7956	15.0619	1549.7	56.2321	-3.25302	43.1062
99		37.7956	15.0619	1551.1	58.5344	-2.04385	46.2128		37.7956	15.0619	1551.1	57.5272	-4.40476	43.6631		37.7956	15.0619	1551.1	56.5356	-3.70229	43.4992
100		37.7956	15.0619	1551.1	56.6186	-5.96609	44.0579		37.7956	15.0619	1551.1	59.1369	-1.60151	44.7376		37.7956	15.0619	1551.1	57.47	-2.34547	44.1427
101		37.7956	15.0619	1551.8	58.1518	-3.07102	49.6199		37.7956	15.0619	1551.8	59.0327	-2.90281	44.5095		37.7956	15.0619	1551.8	57.37	-2.88434	44.8848
102		37.7956	15.0619	1550.5	58.4548	3.3817	43.6686		37.7956	15.0619	1550.5	58.0121	-1.92704	43.8461		37.7956	15.0619	1550.5	56.9751	-3.03805	43.9064
103		37.7956	15.0619	1551	54.228	-8.85091	41.0183		37.7956	15.0619	1551	57.1413	-1.7398	43.82		37.7956	15.0619	1550.9	56.6814	-2.07161	43.3268
104		37.7956	15.0619	1550.3	57.3301	-1.07717	43.5019		37.7956	15.0619	1550.3	57.8388	0.652303	43.956		37.7956	15.0619	1550.3	55.6086	-1.72765	43.2785
105		37.7956	15.062	1549.3	54.7846	-4.10978	42.5059		37.7956	15.062	1549.3	56.4219	-2.02673	43.1846		37.7956	15.062	1549.3	56.161	-1.82609	43.1524
106		37.7956	15.062	1548.3	59.1597	-6.26382	41.8849		37.7956	15.062	1548.3	55.7936	-2.60346	43.7445		37.7956	15.062	1548.3	55.6337	-2.68667	43.9037
107		37.7956	15.0619	1548.5	56.0403	-2.36602	47.0886		37.7956	15.0619	1548.5	56.1224	-1.98229	44.2484		37.7956	15.0619	1548.5	55.9623	-1.5125	43.7308
108		37.7956	15.0619	1549.5	55.0867	-1.04022	43.1047		37.7956	15.0619	1549.5	57.4457	-6.21431	43.5865		37.7956	15.0619	1549.5	56.0989	-4.92256	43.6547
109		37.7956	15.0619	1550.2	58.4969	-12.2981	43.506		37.7956	15.0619	1550.2	58.1884	-6.19593	44.1578		37.7956	15.0619	1550.2	56.899	-4.75992	44.2655
110		37.7956	15.0619	1551.1	57.8177	-3.28947	46.7295		37.7956	15.0619	1551.1	58.9025	-3.81494	46.2476		37.7956	15.0619	1551.1	57.3576	-3.07905	45.0733
